# Supplementary material for: Unique Toll-Like Receptor 4 Activation by NAMPT/PBEF Induces NFκB Signaling and Inflammatory Lung Injury
Source: PubMed Central journal article supplement (PMC4536637; doi:10.1038/srep13135), 2015-08-14

**Supplemental Data for:**

**Unique Toll-Like Receptor 4 Activation by NAMPT/PBEF Induces  
NFκB Signaling and Inflammatory Lung Injury**

Sara M. Camp<sup>\*1</sup>, Ermelinda Ceco<sup>\*2</sup>, Carrie L. Evenoski<sup>\*1</sup>, Sergei M. Danilov<sup>3</sup>, Tong Zhou<sup>1</sup>, Eddie T. Chiang<sup>1</sup>, Liliana Moreno-Vinasco<sup>2</sup>, Brandon Mapes<sup>2</sup>, Jieling Zhao<sup>4</sup>, Gamze Gursoy<sup>4</sup>, Mary E. Brown<sup>2</sup>, Djanybek M. Adyshev<sup>2</sup>, Shahid S. Siddiqui<sup>2</sup>, Hector Quijada<sup>1</sup>, Saad Sammani<sup>2</sup>, Eleftheria Letsiou<sup>2</sup>, Laleh Saadat<sup>2</sup>, Mohammed Yousef<sup>5</sup>, Ting Wang<sup>1</sup>, Jie Liang<sup>4</sup>, Joe G. N. Garcia<sup>§1</sup>

<sup>1</sup>Department of Medicine and Arizona Respiratory Center, The University of Arizona;

<sup>2</sup>Institute for Personalized Respiratory Medicine, University of Illinois at Chicago;

<sup>3</sup>Department of Anesthesiology, University of Illinois at Chicago

<sup>4</sup>Department of Bioengineering, University of Illinois at Chicago

<sup>5</sup>Life Science Group, Bio-Rad Laboratories, Inc.

\*Contributed equally to this work

**§Corresponding Author:**

Joe G. N. Garcia, MD

Senior Vice President for Health Sciences

Arizona Health Sciences Center

University of Arizona

1295 N. Martin Ave., Tucson AZ 85721-0202

Phone: (520) 626-1197

Fax: (520) 626-1460

Email: skipgarcia@email.arizona.edu

**Running Title:** Toll-Like Receptor 4 Activation by NAMPT/PBEF

**Supplement Figure 1.** Isotype control immunohistochemistry staining of p-NFκB in lung tissues. Either SB (control, top) or VILI (bottom) mouse lung sections were stained with the same immunohistochemistry protocol/reagents as previously reported minus the selective p-NFκB primary antibody, which was replaced with a non-selective IgG control antibody. No clear positive staining were identified in any of these slides. Representative images shown. Scale bar = 100μM.

IHC Isotype Controls

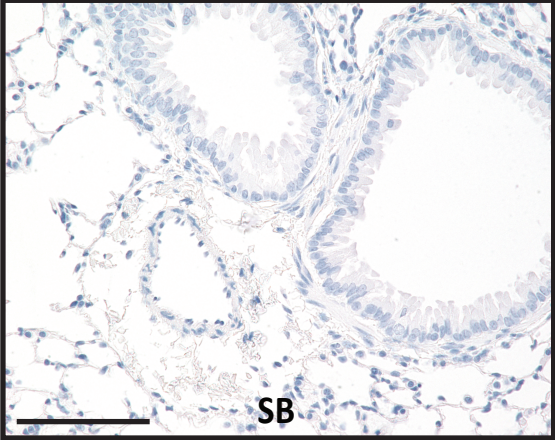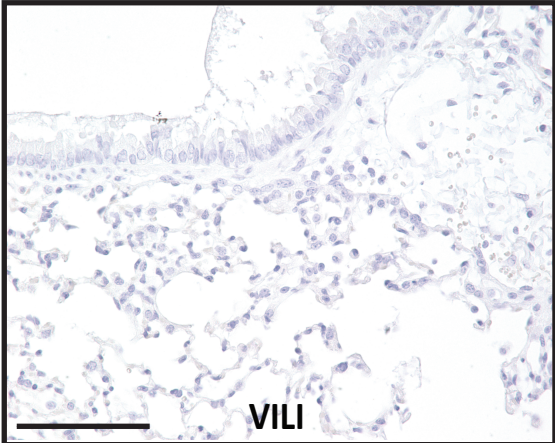

Supplement: srep13135-s1.pdf [file srep13135-s1.pdf]
